# Supplementary material for: Controlling the Redox Catalytic Activity of a Cyclic Selenide Fused to 18-Crown-6 by the Conformational Transition Induced by Coordination to an Alkali Metal Ion
Source: MDPI journal article supplement (doi:10.3390/molecules28083607), 2023-04-20
Supplement: s1 [file s1]

## Supporting Information

### **Controlling the redox catalytic activity of a cyclic selenide fused to 18-crown-6 by the conformational transition induced by coordination to an alkali metal**

Michio Iwaoka<sup>1,2,\*</sup>, Hajime Oba<sup>1</sup> and Takeru Ito<sup>1</sup>

<sup>1</sup> Department of Chemistry, School of Science, Tokai University, Hiratsuka-shi, Kanagawa 259-1292, Japan

<sup>2</sup> Institute of Advanced Biosciences, Tokai University, Hiratsuka-shi, Kanagawa 259-1292, Japan

\* Correspondence: miwaoka@tokai.ac.jp; Tel.: +81-463-63-4356

#### **Contents**

- 1. <sup>1</sup>H, <sup>13</sup>C and <sup>77</sup>Se NMR and MALDI-TOF-MS spectra for DHS-crowns (1-4).**
- 2. X-ray crystal data for DHS-crown-4 (1), DHS-crown-4·0.5KI·H<sub>2</sub>O (5), DHS-crown-4·0.5NaBr·2H<sub>2</sub>O (6), DHS-crown-5·0.5KI (7) and DHS-crown-6·KI (8).**
- 3. Changes of NMR spectra for DHS-crown-6 (3) in CH<sub>3</sub>OD by complexation with KI.**
- 4. Series of <sup>1</sup>H NMR spectra during <sup>1</sup>H NMR titration experiments.**
- 5. Series of <sup>1</sup>H NMR spectra during the redox catalytic activity assay for DHS-crown-6 (3) and the KCl complex.**
- 6. <sup>1</sup>H and <sup>77</sup>Se NMR spectra for the selenoxide of DHS-crown-6 (3<sup>ox</sup>) and the KCl complex.**
- 7. Results of DFT calculation.**

1.  $^1\text{H}$ ,  $^{13}\text{C}$  and  $^{77}\text{Se}$  NMR and MALDI-TOF-MS spectra for DHS-crowns (1-4).

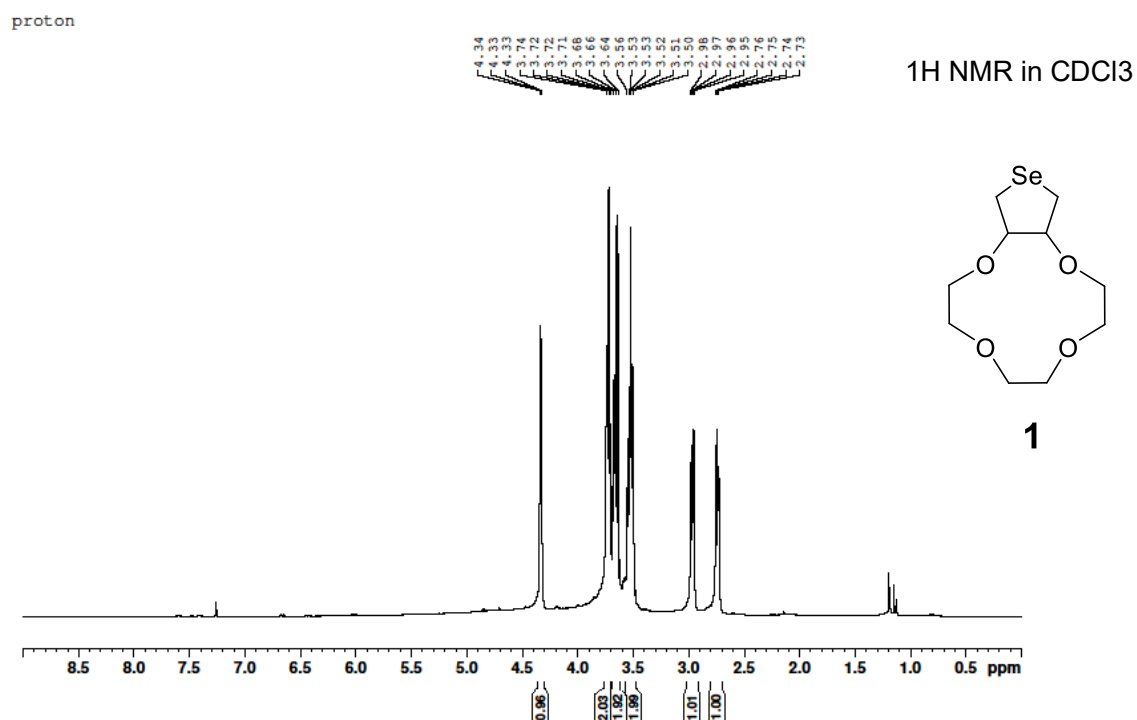

Figure S1.  $^1\text{H}$  NMR spectrum for DHS-crown-4 (1) in  $\text{CDCl}_3$ .

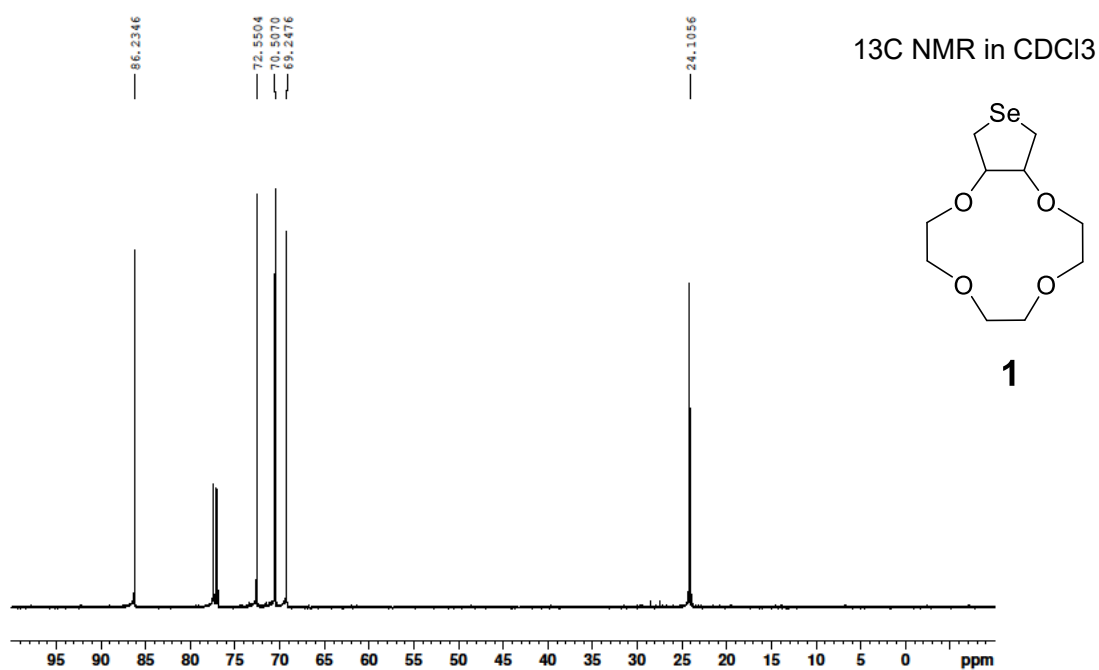

Figure S2.  $^{13}\text{C}$  NMR spectrum for DHS-crown-4 (1) in  $\text{CDCl}_3$ .



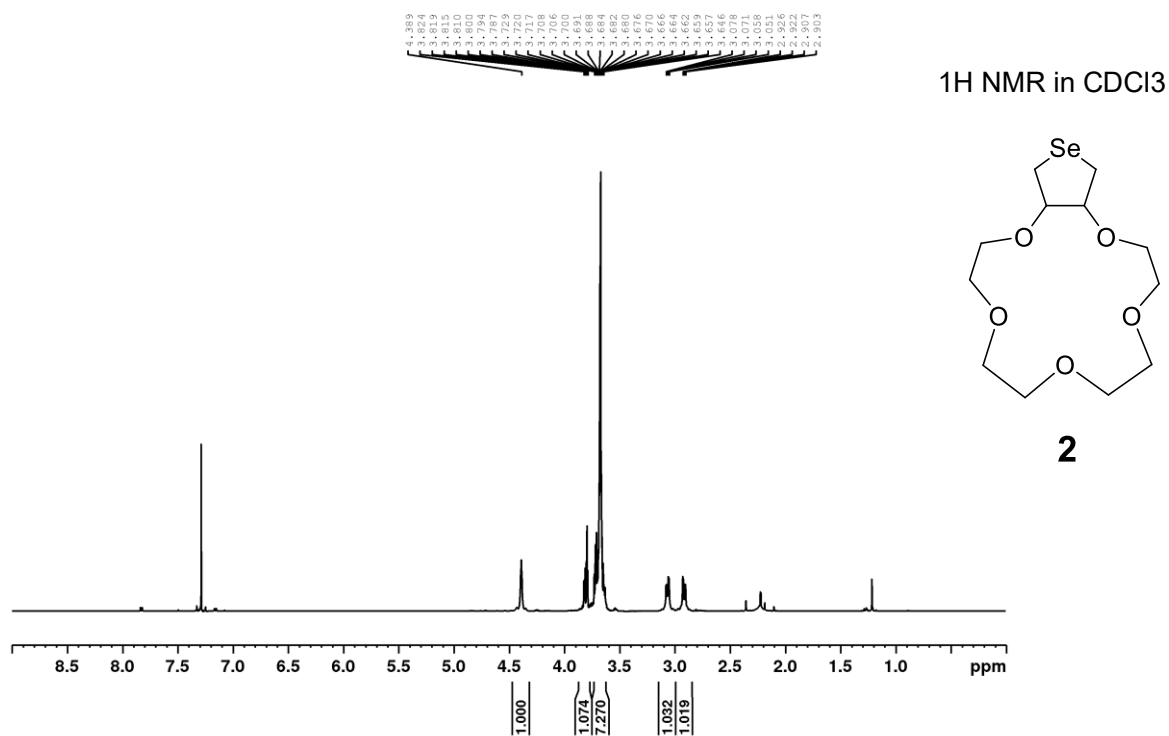

**Figure S5.** <sup>1</sup>H NMR spectrum for DHS-crown-5 (**2**) in CDCl<sub>3</sub>.

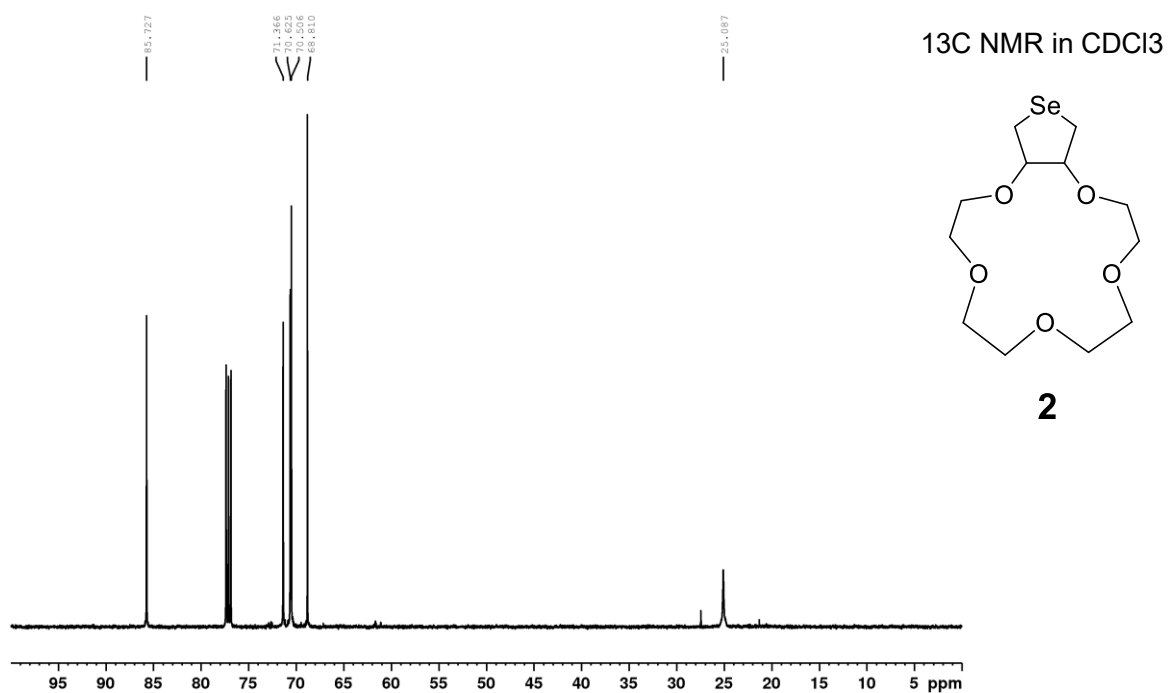

**Figure S6.** <sup>13</sup>C NMR spectrum for DHS-crown-5 (**2**) in CDCl<sub>3</sub>.

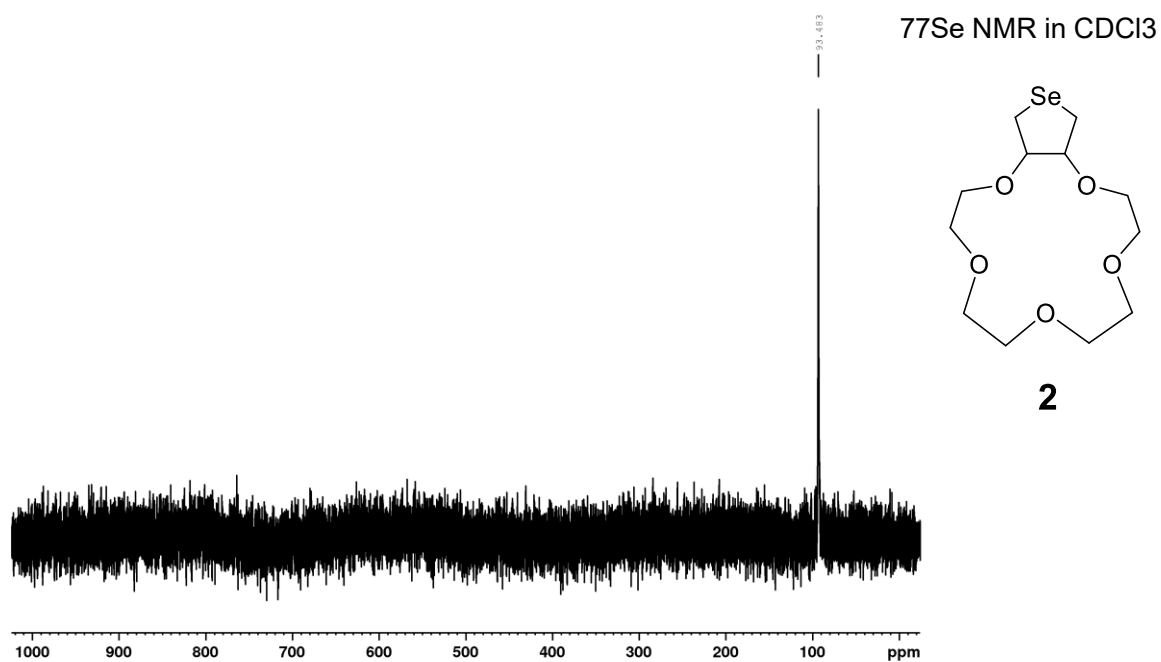

**Figure S7.** <sup>77</sup>Se NMR spectrum for DHS-crown-5 (**2**) in CDCl<sub>3</sub>.

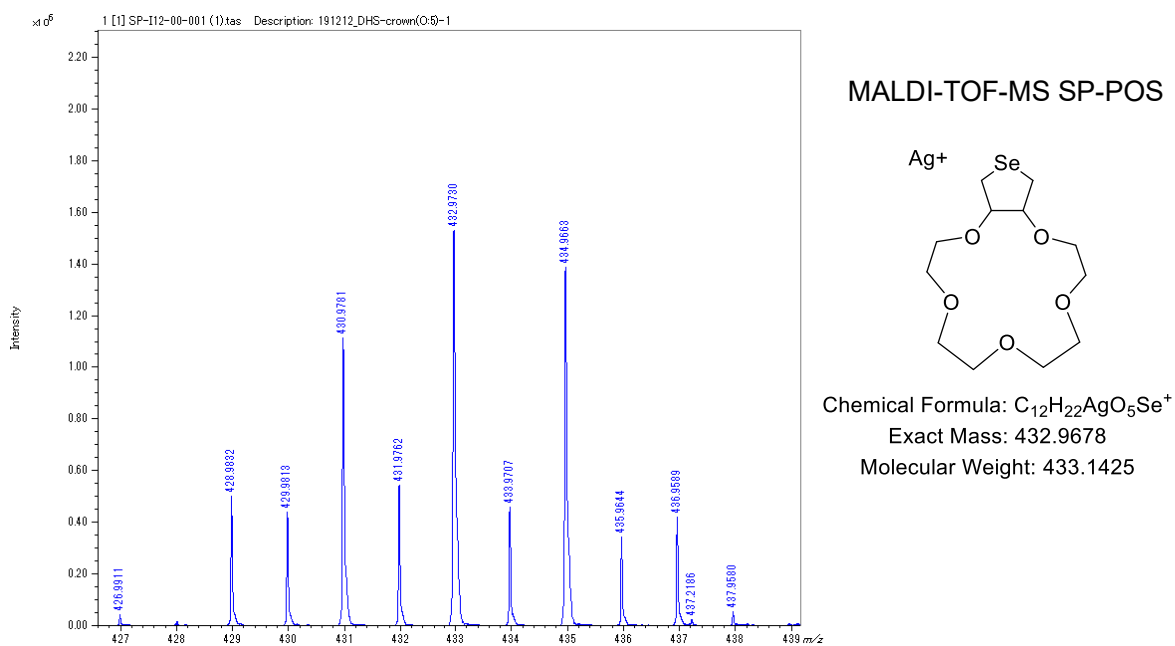

**Figure S8.** MALDI-TOF-MS spectrum for DHS-crown-5 (**2**)

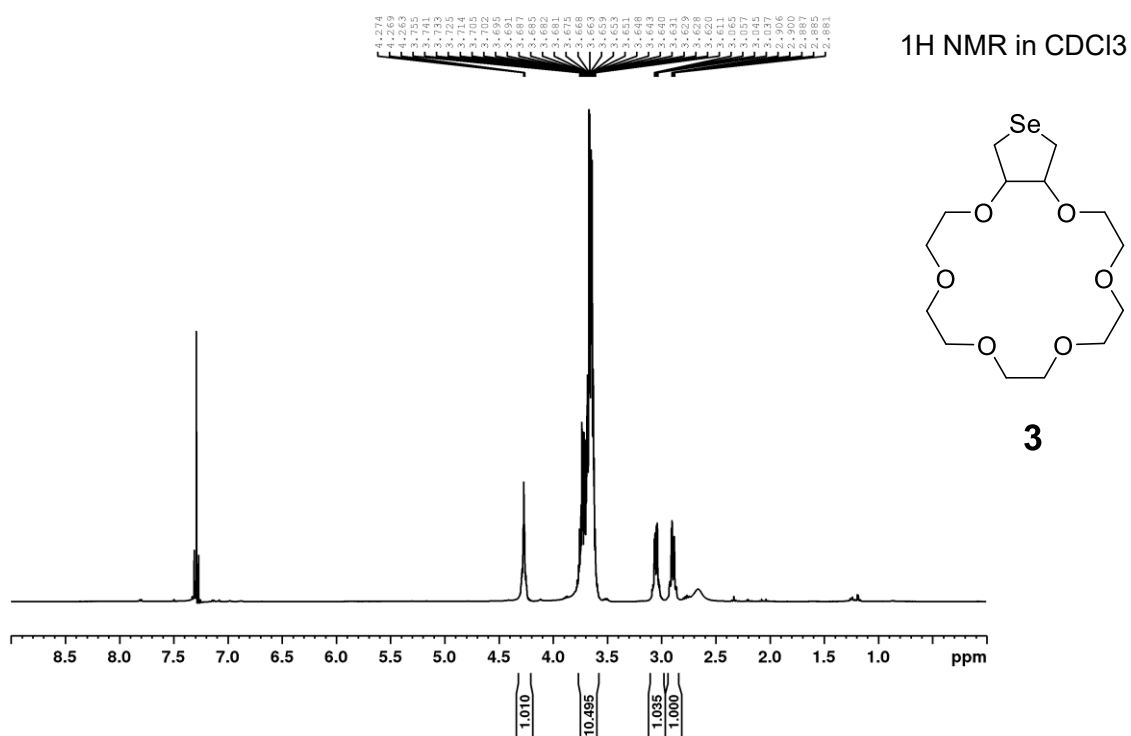

**Figure S9.** <sup>1</sup>H NMR spectrum for DHS-crown-6 (**3**) in CDCl<sub>3</sub>.

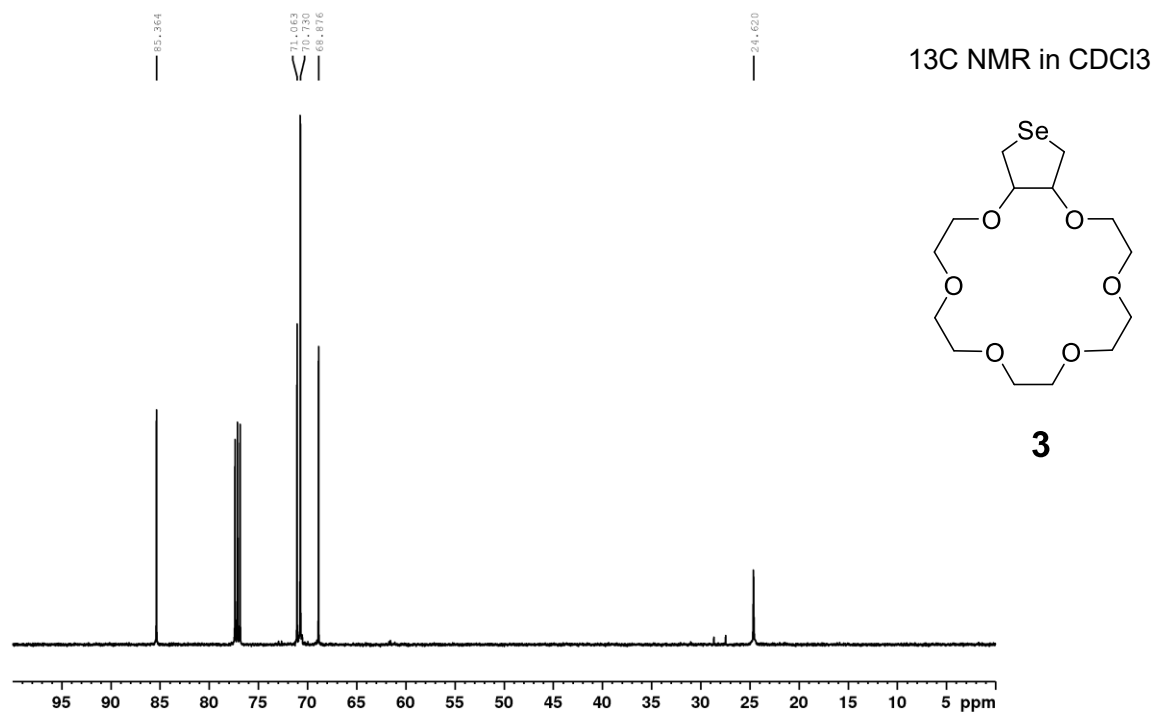

**Figure S10.** <sup>13</sup>C NMR spectrum for DHS-crown-6 (**3**) in CDCl<sub>3</sub>.

180130\_DHS[18]crown-6 77Se

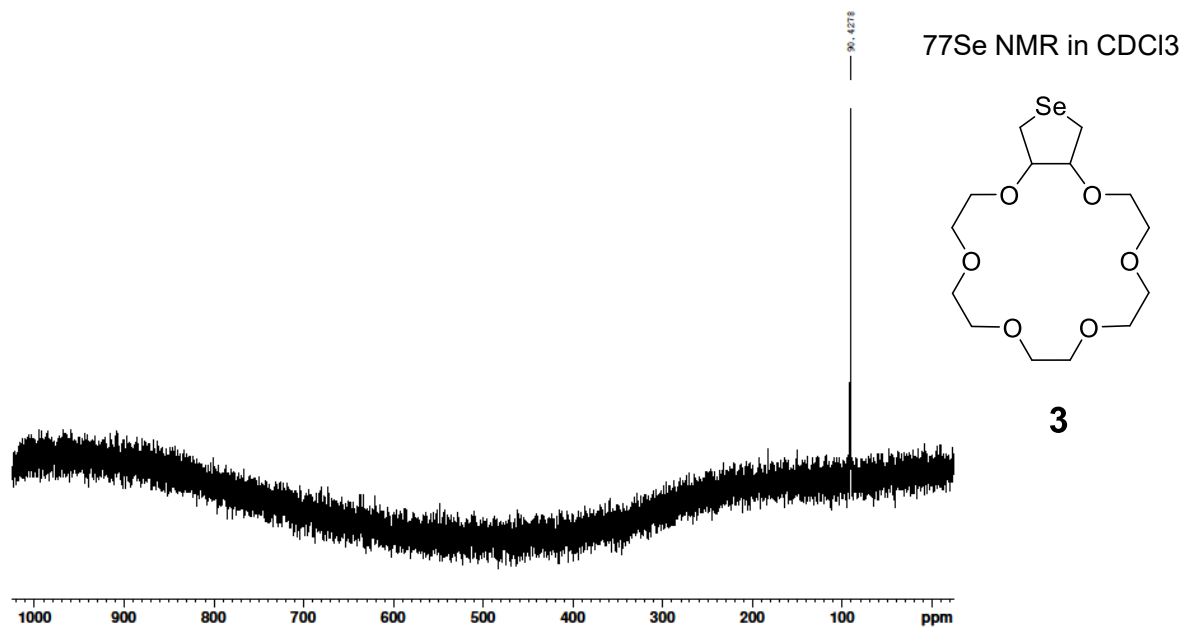

**Figure S11.** <sup>77</sup>Se NMR spectrum for DHS-crown-6 (**3**) in CDCl<sub>3</sub>.

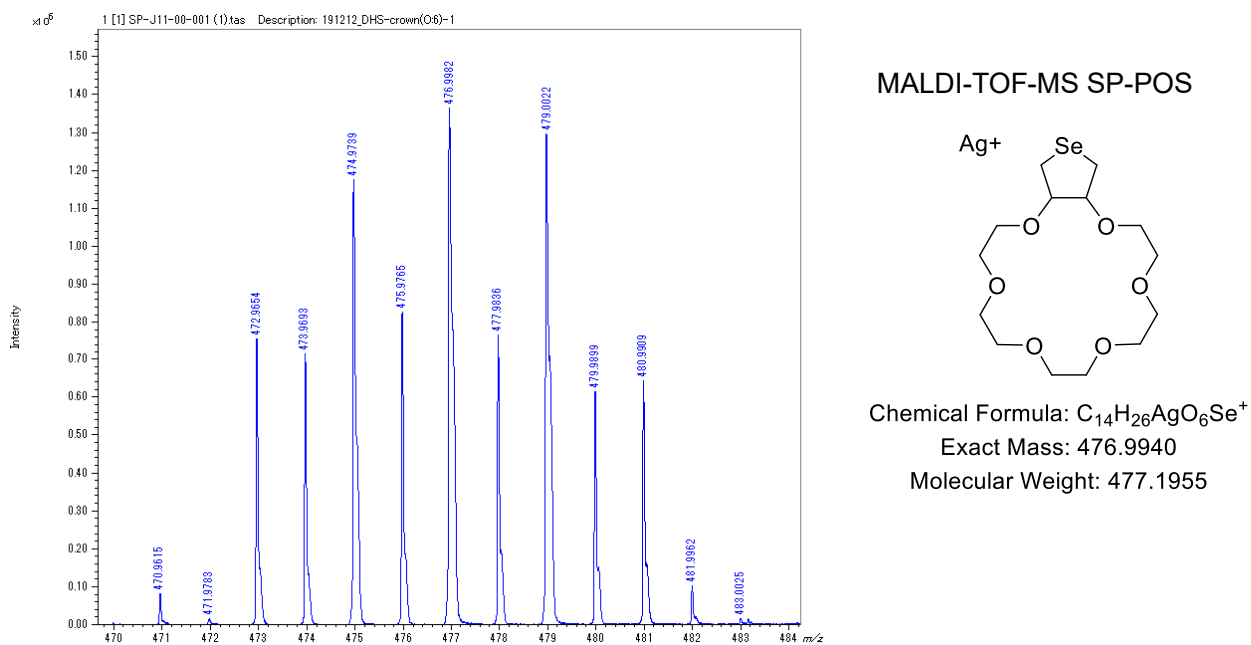

**Figure S12.** MALDI-TOF-MS spectrum for DHS-crown-6 (**3**).

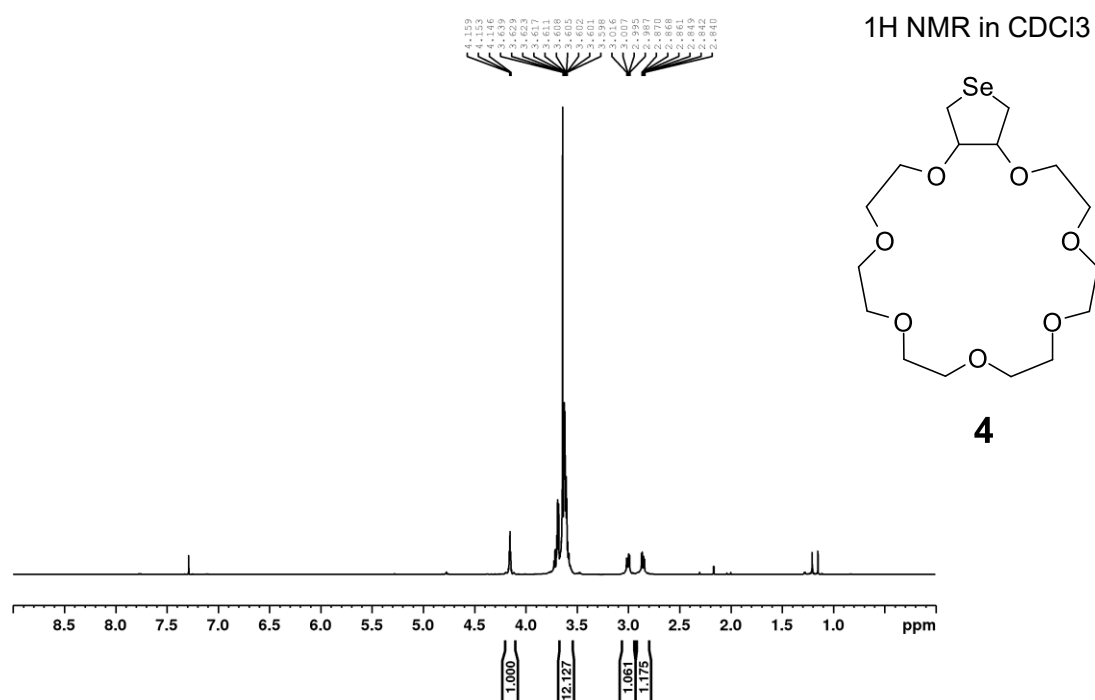

**Figure S13.** <sup>1</sup>H NMR spectrum for DHS-crown-7 (**4**) in CDCl<sub>3</sub>.

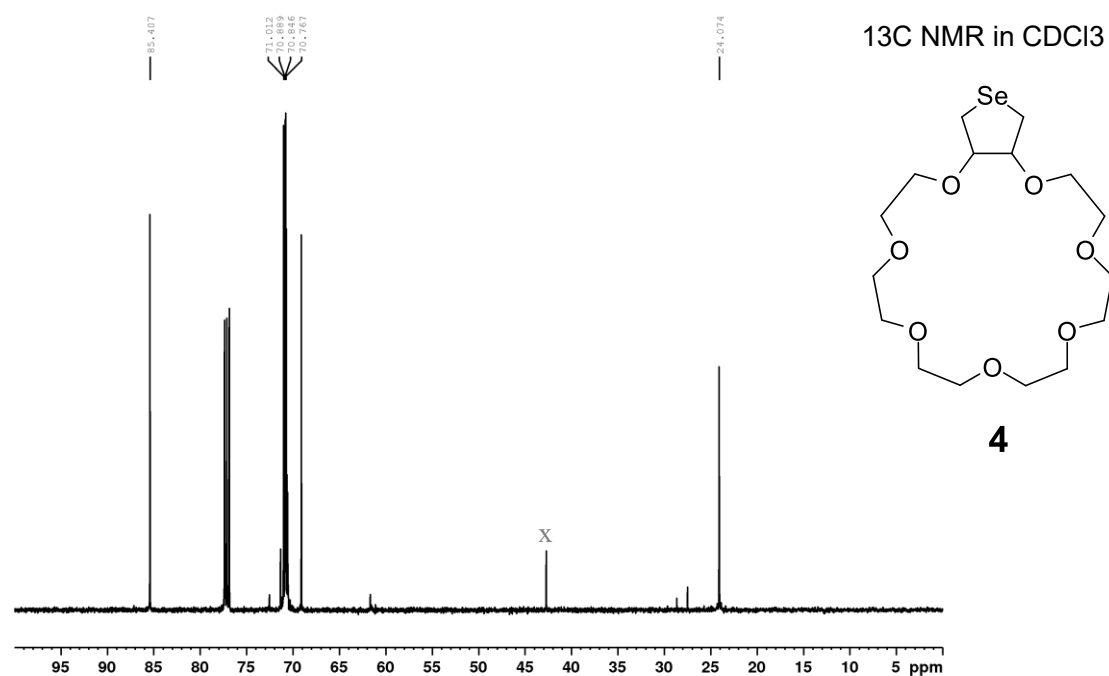

**Figure S14.** <sup>13</sup>C NMR spectrum for DHS-crown-7 (**4**) in CDCl<sub>3</sub>.



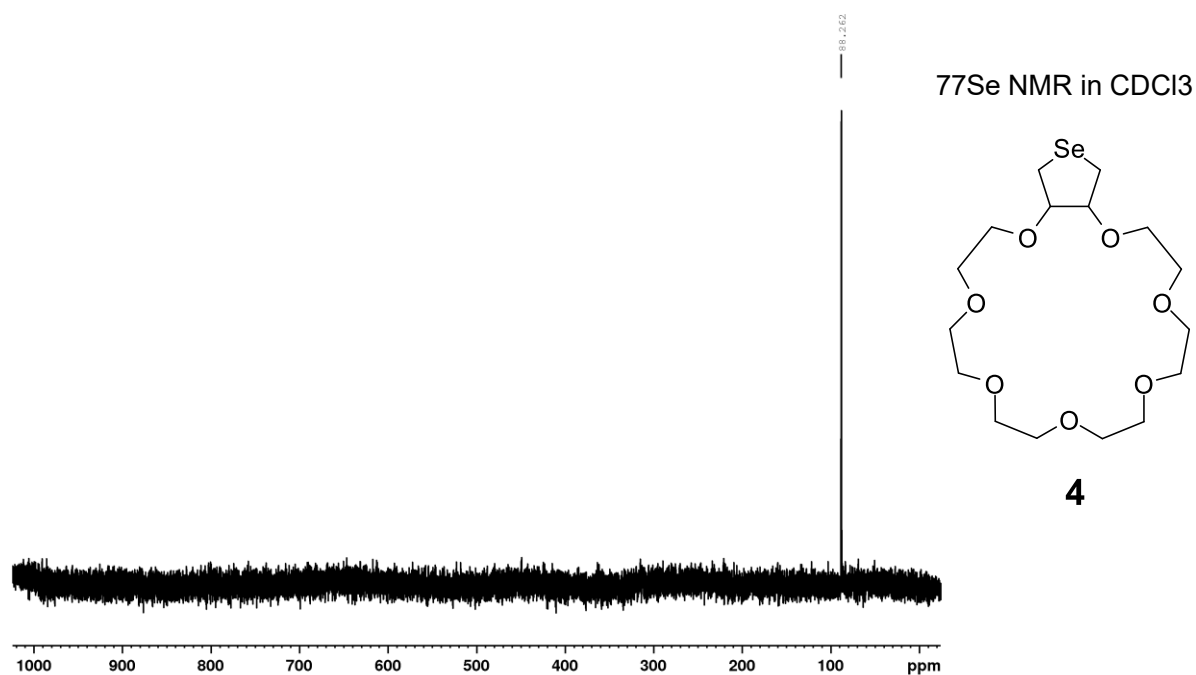

**Figure S15.** <sup>77</sup>Se NMR spectrum for DHS-crown-7 (**4**) in CDCl<sub>3</sub>.

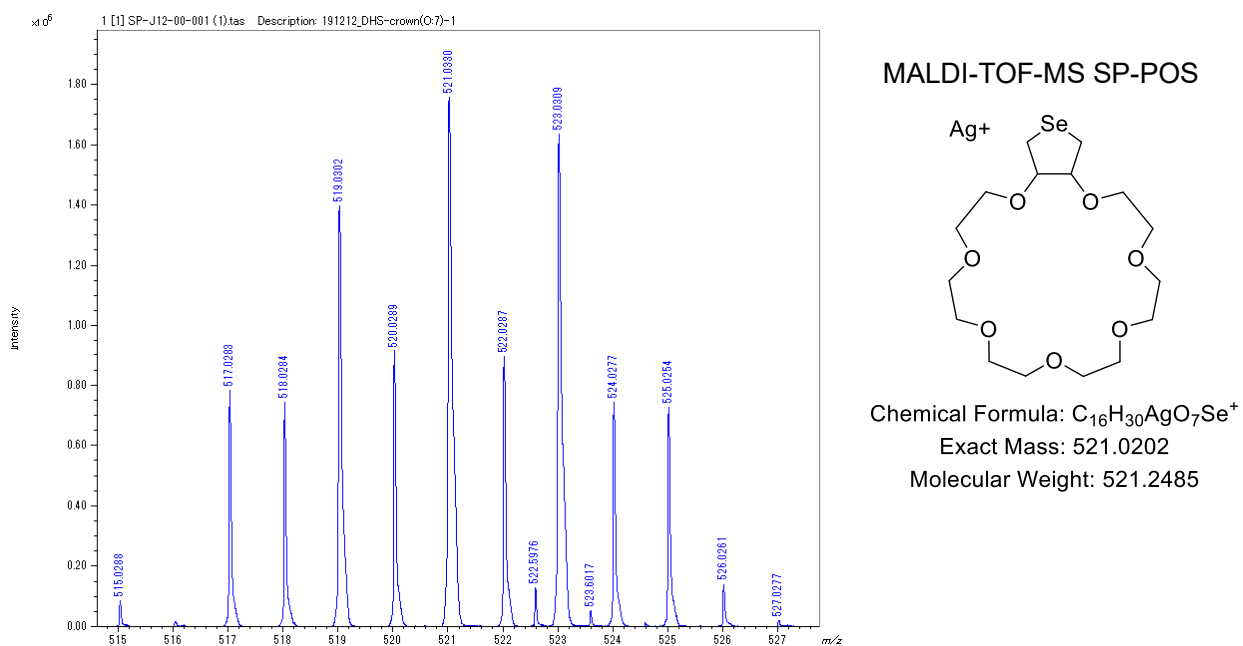

**Figure S16.** MALDI-TOF-MS spectrum for DHS-crown-7 (**4**).

**2. X-ray crystal data for DHS-crown-4 (1), DHS-crown-4·0.5KI·H<sub>2</sub>O (5), DHS-crown-4·0.5NaBr·2H<sub>2</sub>O (6), DHS-crown-5·0.5KI (7) and DHS-crown-6·KI (8).**

**Table S1.** Crystallographic data for **1**, **5** and **6**.

| Compound                                           | DHS-crown-4 ( <b>1</b> )                          | DHS-crown-4·<br>0.5KI·H <sub>2</sub> O ( <b>5</b> )                | DHS-crown-4·<br>0.5NaBr·2H <sub>2</sub> O ( <b>6</b> )              |
|----------------------------------------------------|---------------------------------------------------|--------------------------------------------------------------------|---------------------------------------------------------------------|
| CCDC Deposition Number                             | 2248791                                           | 2248792                                                            | 2248793                                                             |
| Chemical formula                                   | C <sub>10</sub> H <sub>18</sub> O <sub>4</sub> Se | C <sub>20</sub> H <sub>36</sub> I KO <sub>10</sub> Se <sub>2</sub> | C <sub>20</sub> H <sub>36</sub> BrNaO <sub>12</sub> Se <sub>2</sub> |
| Formula weight                                     | 281.21                                            | 760.42                                                             | 729.31                                                              |
| Crystal system                                     | monoclinic                                        | monoclinic                                                         | triclinic                                                           |
| Space group                                        | <i>I</i> 2/ <i>a</i> (No.15)                      | <i>C</i> 2/ <i>c</i> (No.15)                                       | <i>P</i> $\bar{1}$ (No.2)                                           |
| <i>a</i> (Å)                                       | 10.7800(12)                                       | 13.7060(3)                                                         | 8.3122(2)                                                           |
| <i>b</i> (Å)                                       | 10.5200(12)                                       | 13.8760(3)                                                         | 12.2345(3)                                                          |
| <i>c</i> (Å)                                       | 10.7943(14)                                       | 14.9320(3)                                                         | 15.8196(4)                                                          |
| $\alpha$ (°)                                       | 90.0000                                           | 90.0000                                                            | 75.5659(19)                                                         |
| $\beta$ (°)                                        | 103.056(6)                                        | 100.3900(12)                                                       | 85.3333(19)                                                         |
| $\gamma$ (°)                                       | 90.0000                                           | 90.0000                                                            | 70.649(2)                                                           |
| <i>V</i> (Å <sup>3</sup> )                         | 1192.5(2)                                         | 2793.27(10)                                                        | 1469.98(7)                                                          |
| <i>Z</i>                                           | 4                                                 | 4                                                                  | 2                                                                   |
| $\rho_{\text{calcd}}$ (g cm <sup>-3</sup> )        | 1.566                                             | 1.808                                                              | 1.648                                                               |
| <i>T</i> (K)                                       | 100                                               | 100                                                                | 103                                                                 |
| Wavelength (Å)                                     | 0.70000                                           | 0.70000                                                            | 1.54184                                                             |
| $\mu$ (mm <sup>-1</sup> )                          | 3.002                                             | 3.784                                                              | 5.362                                                               |
| No. of reflections measured                        | 2112                                              | 13002                                                              | 16821                                                               |
| No. of independent reflections                     | 618                                               | 2778                                                               | 5118                                                                |
| <i>R</i> <sub>int</sub>                            | 0.0510                                            | 0.0360                                                             | 0.0462                                                              |
| No. of parameters                                  | 69                                                | 155                                                                | 325                                                                 |
| <i>R</i> <sub>1</sub> ( <i>I</i> > 2σ( <i>I</i> )) | 0.0605                                            | 0.0637                                                             | 0.0897                                                              |
| <i>wR</i> <sub>2</sub> (all data)                  | 0.2137                                            | 0.1785                                                             | 0.2326                                                              |

**Table S2.** Crystallographic data for **7** and **8**.

| Compound                                           | DHS-crown-5·<br>0.5KI ( <b>7</b> )                                 | DHS-crown-6·<br>KI ( <b>8</b> )                               |
|----------------------------------------------------|--------------------------------------------------------------------|---------------------------------------------------------------|
| CCDC Deposition Number                             | 2248794                                                            | 2248795                                                       |
| Chemical formula                                   | C <sub>24</sub> H <sub>44</sub> I KO <sub>10</sub> Se <sub>2</sub> | C <sub>14</sub> H <sub>26</sub> I KO <sub>6</sub> Se          |
| Formula weight                                     | 816.53                                                             | 535.32                                                        |
| Crystal system                                     | triclinic                                                          | orthorhombic                                                  |
| Space group                                        | <i>P</i> $\bar{1}$ (No.2)                                          | <i>P</i> 2 <sub>1</sub> 2 <sub>1</sub> 2 <sub>1</sub> (No.19) |
| <i>a</i> (Å)                                       | 9.4499(2)                                                          | 10.929(2)                                                     |
| <i>b</i> (Å)                                       | 13.4634(3)                                                         | 13.228(3)                                                     |
| <i>c</i> (Å)                                       | 14.0735(3)                                                         | 13.840(4)                                                     |
| $\alpha$ (°)                                       | 82.323(2)                                                          | 90.0000                                                       |
| $\beta$ (°)                                        | 70.588(2)                                                          | 90.0000                                                       |
| $\gamma$ (°)                                       | 72.664(2)                                                          | 90.0000                                                       |
| <i>V</i> (Å <sup>3</sup> )                         | 1610.85(7)                                                         | 2000.8(8)                                                     |
| <i>Z</i>                                           | 2                                                                  | 4                                                             |
| $\rho_{\text{calcd}}$ (g cm <sup>-3</sup> )        | 1.683                                                              | 1.777                                                         |
| <i>T</i> (K)                                       | 100                                                                | 100                                                           |
| Wavelength (Å)                                     | 0.71073                                                            | 0.71075                                                       |
| $\mu$ (mm <sup>-1</sup> )                          | 3.431                                                              | 3.652                                                         |
| No. of reflections measured                        | 24510                                                              | 14039                                                         |
| No. of independent reflections                     | 8254                                                               | 4179                                                          |
| <i>R</i> <sub>int</sub>                            | 0.0472                                                             | 0.0908                                                        |
| No. of parameters                                  | 343                                                                | 209                                                           |
| <i>R</i> <sub>1</sub> ( <i>I</i> > 2σ( <i>I</i> )) | 0.0526                                                             | 0.0470                                                        |
| <i>wR</i> <sub>2</sub> (all data)                  | 0.1053                                                             | 0.1107                                                        |

### 3. Changes of NMR spectra for DHS-crown-6 (**3**) in CH<sub>3</sub>OD by complexation with KI.

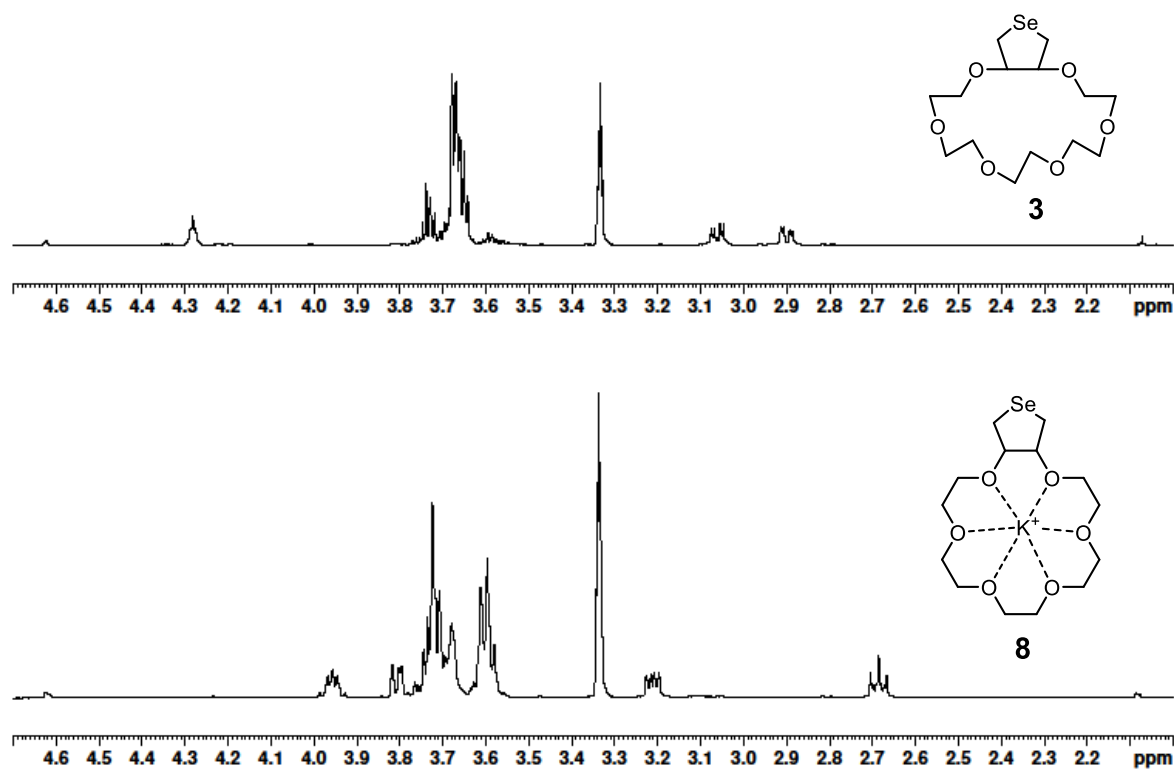

**Figure S17.** Changes of <sup>1</sup>H NMR spectrum for DHS-crown-6 (**3**) in CD<sub>3</sub>OD by addition of KI.

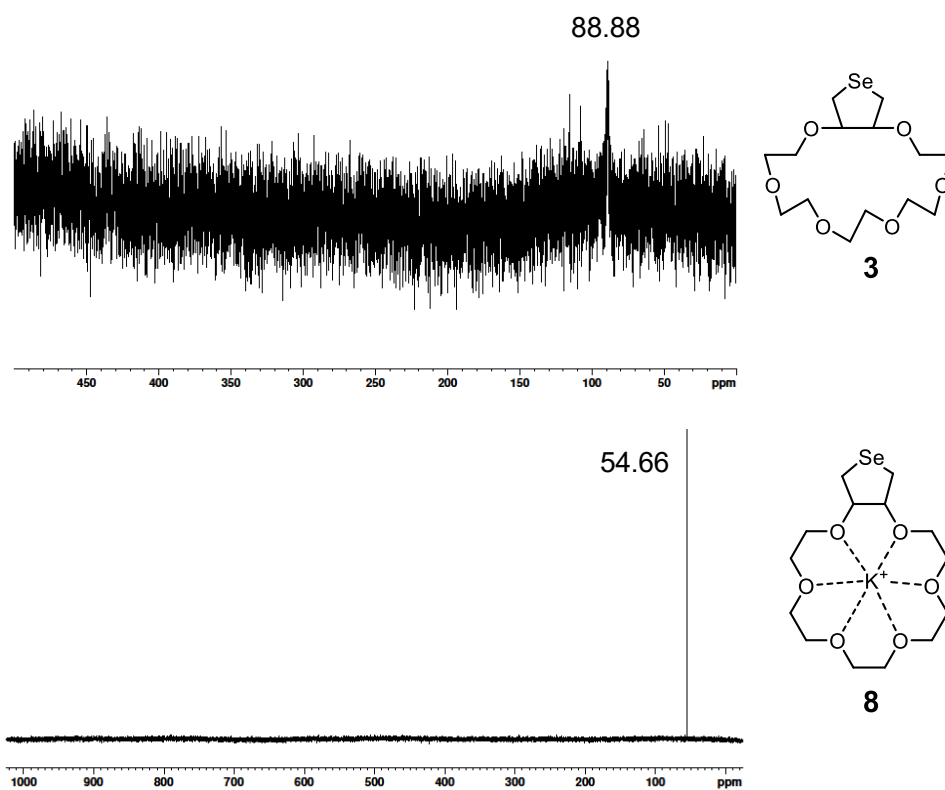

**Figure S18.** Changes of <sup>77</sup>Se NMR spectrum for DHS-crown-6 (**3**) in CD<sub>3</sub>OD by addition of KI.



#### 4. Series of $^1\text{H}$ NMR spectra during $^1\text{H}$ NMR titration experiments.

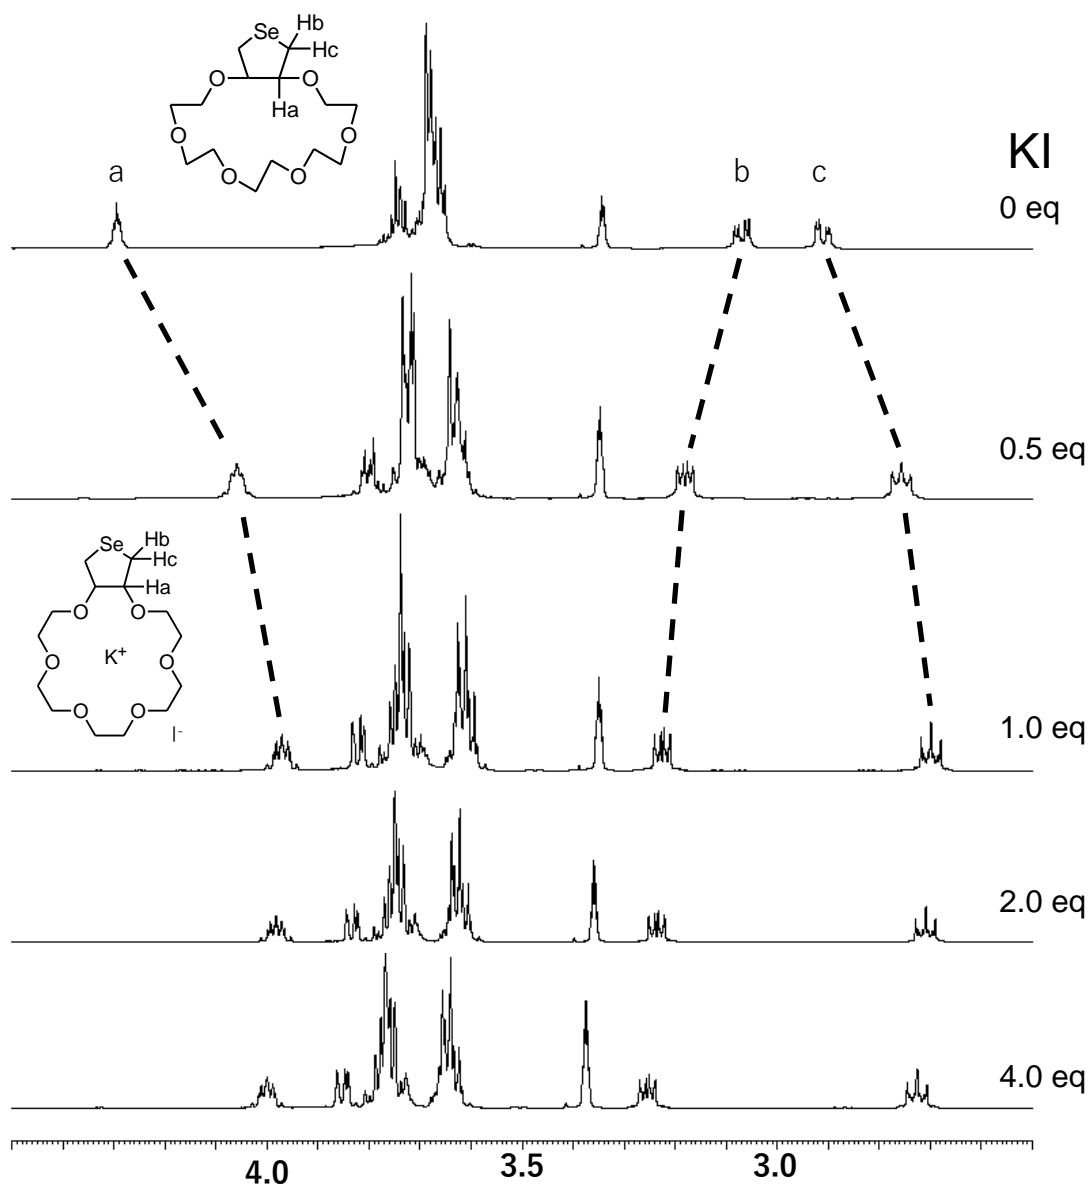

**Figure S20.** Changes of  $^1\text{H}$  NMR spectrum for DHS-crown-6 (**3**) in  $\text{CD}_3\text{OD}$  with addition of KI (from 0 to 4.0 eq).

**5. Series of  $^1\text{H}$  NMR spectra during the redox catalytic activity assay for DHS-crown-6 (**3**) and the KCl complex.**

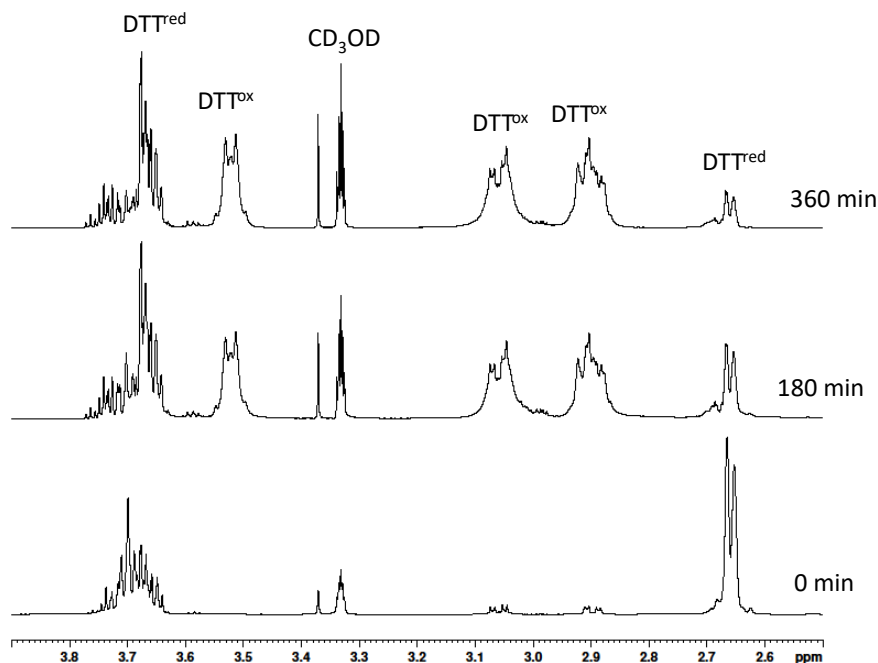

**Figure S21.**  $^1\text{H}$  NMR spectra for the mixture of  $\text{H}_2\text{O}_2$  (0.15 mmol) and  $\text{DTT}^{\text{red}}$  (0.15 mmol) in the presence of DHS-crown-6 (**3**) (0.015 mmol) in  $\text{CD}_3\text{OD}$  (1.1 mL) at  $25^\circ\text{C}$  as a function of the reaction time.

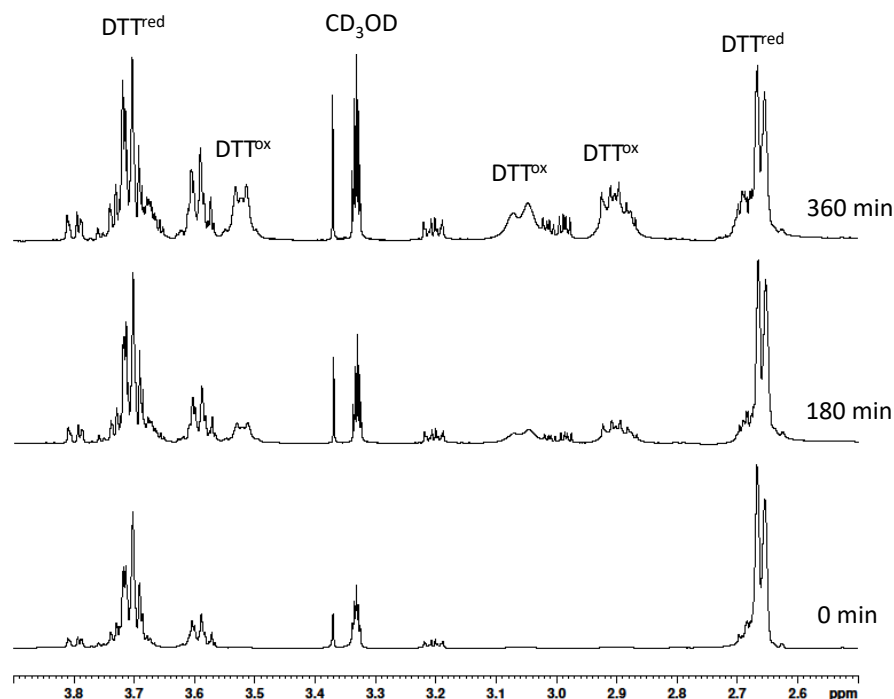

**Figure S22.**  $^1\text{H}$  NMR spectra for the mixture of  $\text{H}_2\text{O}_2$  (0.15 mmol) and  $\text{DTT}^{\text{red}}$  (0.15 mmol) in the presence of DHS-crown-6 (**3**) (0.015 mmol) and KCl (0.015 mmol) in  $\text{CD}_3\text{OD}$  (1.1 mL) at  $25^\circ\text{C}$  as a function of the reaction time.

6.  $^1\text{H}$  and  $^{77}\text{Se}$  NMR spectra for the selenoxide of DHS-crown-6 ( $3^{\text{ox}}$ ) and the KCl complex.

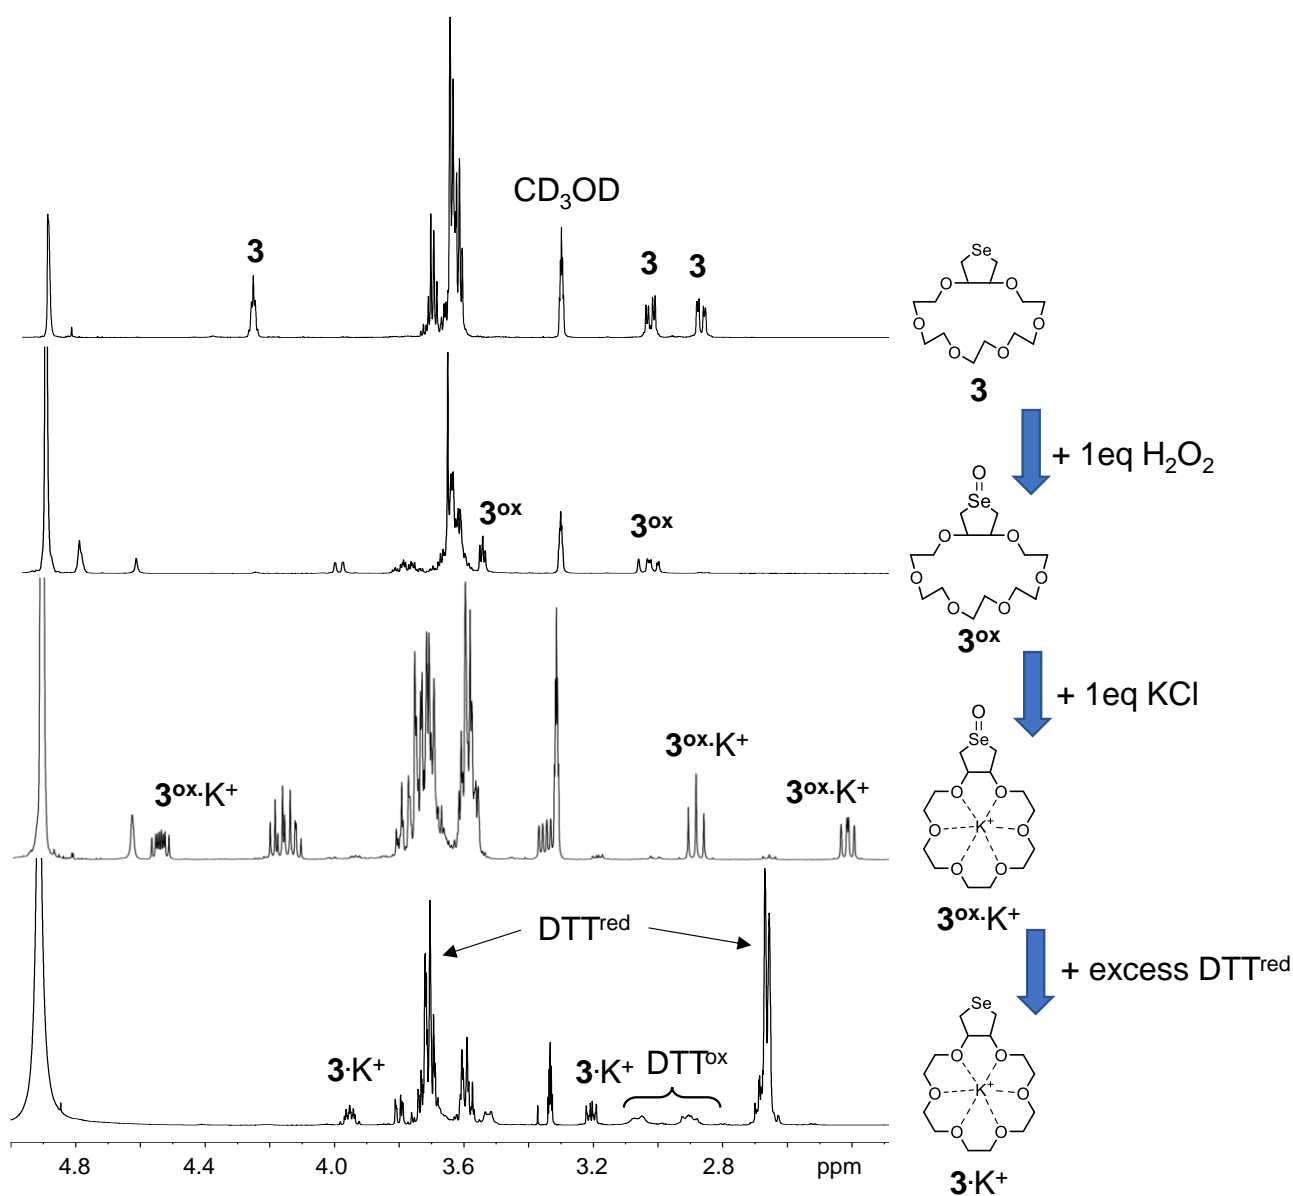

**Figure S23** A series of  $^1\text{H}$  NMR spectra during the formation of the  $3^{\text{ox}}\cdot\text{K}^+$  complex and the reaction with  $\text{DTT}^{\text{red}}$  in  $\text{CD}_3\text{OD}$ .



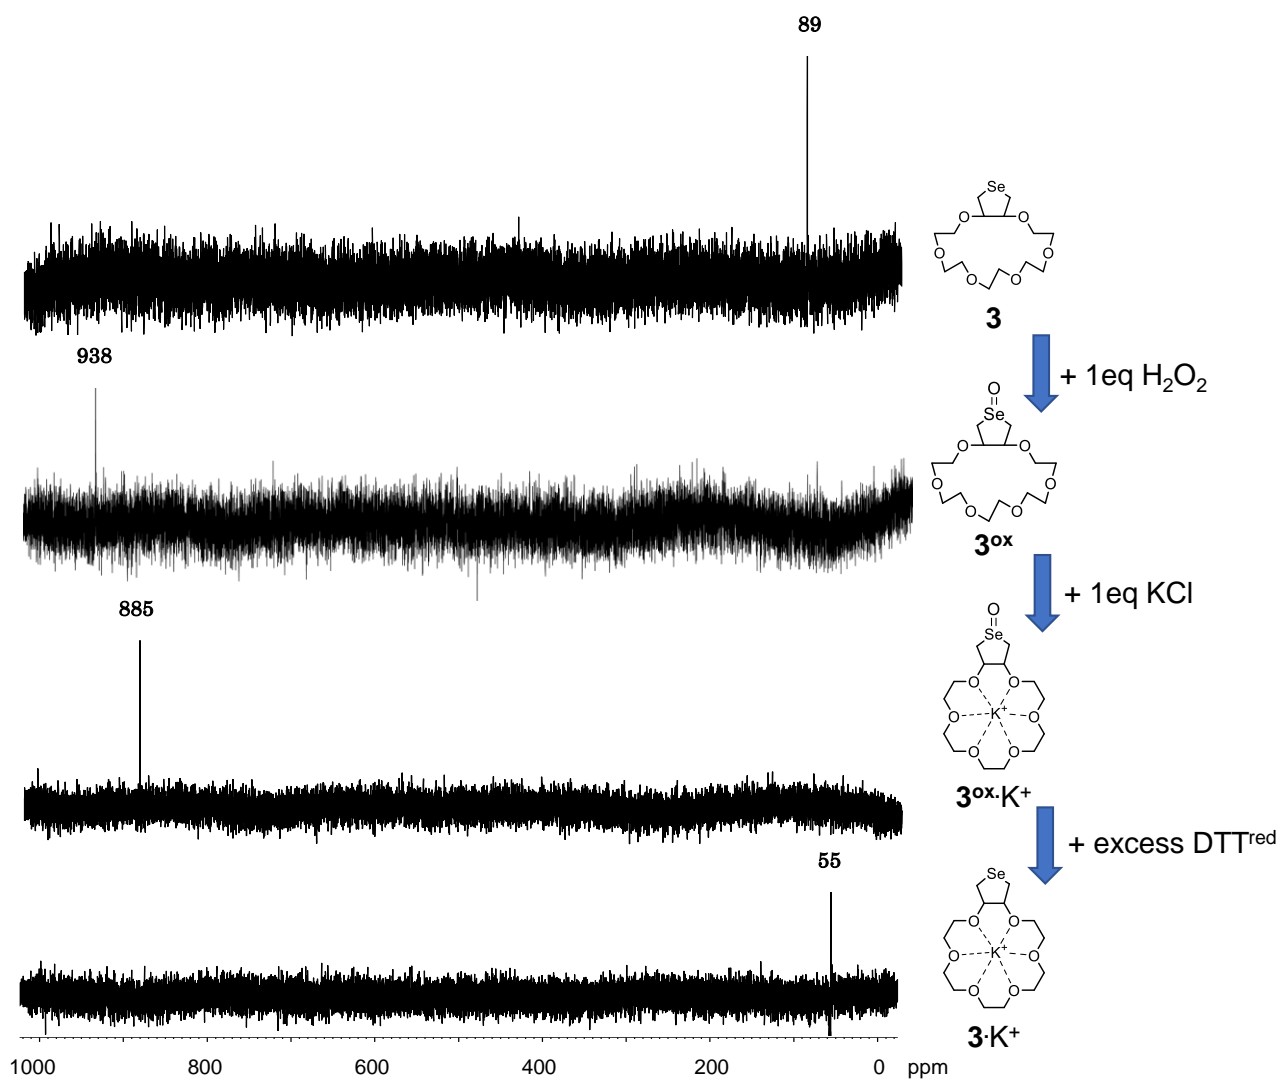

**Figure S24** A series of  $^{77}\text{Se}$  NMR spectra during the formation of the **3<sup>ox</sup>·K<sup>+</sup>** complex and the reaction with  $\text{DTT}^{\text{red}}$  in  $\text{CD}_3\text{OD}$ .

## 7. Results of DFT calculation.

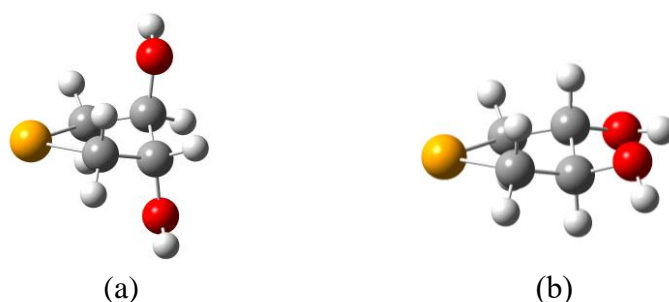

**Figure S25.** Molecular structures of DHS obtained by DFT calculation at B3LYP/6-311+g(2df,p) with PCM (solvent = methanol). (a) Diaxial conformer. (b) Diequatorial conformer.

**Table S3.** Cartesian coordinates for the diaxial conformer of DHS optimized at B3LYP/6-311+g(2df,p) with PCM (solvent = methanol).

| Center<br>Number | Atomic<br>Number | Atomic<br>Type | Coordinates (Angstroms) |           |           |
|------------------|------------------|----------------|-------------------------|-----------|-----------|
|                  |                  |                | X                       | Y         | Z         |
| 1                | 6                | 0              | 0.006188                | 0.004786  | 0.024774  |
| 2                | 6                | 0              | -0.005187               | 0.032820  | 1.551433  |
| 3                | 6                | 0              | 2.471630                | -0.015800 | 0.272656  |
| 4                | 6                | 0              | 1.293497                | -0.682177 | -0.434132 |
| 5                | 1                | 0              | -0.317970               | -0.927632 | 1.954082  |
| 6                | 1                | 0              | -0.654463               | 0.815840  | 1.939071  |
| 7                | 1                | 0              | 2.739128                | 0.917694  | -0.216691 |
| 8                | 1                | 0              | 3.343591                | -0.666288 | 0.311295  |
| 9                | 34               | 0              | 1.864895                | 0.384462  | 2.121217  |
| 10               | 8                | 0              | 1.152890                | -2.057928 | -0.093013 |
| 11               | 1                | 0              | 1.938615                | -2.534746 | -0.382375 |
| 12               | 8                | 0              | 0.024679                | 1.307858  | -0.550104 |
| 13               | 1                | 0              | -0.781759               | 1.772347  | -0.300393 |
| 14               | 1                | 0              | -0.857641               | -0.560950 | -0.342176 |
| 15               | 1                | 0              | 1.398949                | -0.567798 | -1.518894 |

**Table S4.** Cartesian coordinates for the diequatorial conformer of DHS optimized at B3LYP/6-311+g(2df,p) with PCM (solvent = methanol).

| Center<br>Number | Atomic<br>Number | Atomic<br>Type | Coordinates (Angstroms) |           |           |
|------------------|------------------|----------------|-------------------------|-----------|-----------|
|                  |                  |                | X                       | Y         | Z         |
| 1                | 6                | 0              | -0.005632               | -0.009633 | 0.003073  |
| 2                | 6                | 0              | -0.010800               | 0.005064  | 1.526153  |
| 3                | 6                | 0              | 2.457956                | -0.004919 | 0.183109  |
| 4                | 6                | 0              | 1.275128                | -0.704160 | -0.461149 |
| 5                | 1                | 0              | -0.000193               | 1.015820  | -0.383628 |
| 6                | 1                | 0              | -0.283840               | -0.971058 | 1.922179  |
| 7                | 1                | 0              | -0.665699               | 0.767466  | 1.941279  |
| 8                | 1                | 0              | 2.691224                | 0.920490  | -0.339948 |
| 9                | 1                | 0              | 3.343642                | -0.632788 | 0.230840  |
| 10               | 1                | 0              | 1.231012                | -1.748038 | -0.121870 |
| 11               | 8                | 0              | 1.415162                | -0.665319 | -1.875827 |
| 12               | 1                | 0              | 0.590213                | -0.998243 | -2.254166 |
| 13               | 8                | 0              | -1.103028               | -0.730787 | -0.555000 |
| 14               | 1                | 0              | -1.890073               | -0.175009 | -0.547644 |
| 15               | 34               | 0              | 1.866213                | 0.419873  | 2.034034  |
